# Supplementary material for: Personality Traits Associated with the Risk of Exercise Dependence in Ultraendurance Athletes: A Cross-Sectional Study
Source: MDPI journal article supplement (doi:10.3390/ijerph20021042), 2023-01-06
Supplement: s1 [file s1]

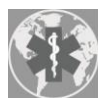

**Table S1:** List of the federations/event/social media groups targeted for the survey.

|                                    |                                                                |
|------------------------------------|----------------------------------------------------------------|
| <b>National Sports Federations</b> | Fédération Française d'Athlétisme (athletics)                  |
|                                    | Fédération Française de Triathlon (triathlon)                  |
|                                    | Fédération Française de Natation (swimming)                    |
|                                    | Fédération Française de Cyclisme (cycling)                     |
| <b>Ultraendurance events</b>       | Ultra Trail Mont Blanc (UTMB) (mountain ultramarathon)         |
|                                    | Ultra Trail scientifique Clécy (UTCS) (mountain ultramarathon) |
|                                    | Triathlon International de Deauville (triathlon)               |
|                                    | La Barjo Ultra Trail (mountain ultramarathon)                  |
|                                    | Ch'TriMan Gravelines (triathlon)                               |
|                                    | FrenchMan Triathlon (triathlon)                                |
|                                    | Triathlon de la Madeleine (triathlon)                          |
|                                    | T24 Xtrem Triathlon (triathlon)                                |
|                                    | BearMan Xtri (triathlon)                                       |
|                                    | Triathlon de l'Alpe d'Huez (triathlon)                         |
|                                    | Troll Enez Swimrun (swimrun)                                   |
|                                    | Gravelman Series (cycling)                                     |
|                                    | Ironlakes (triathlon)                                          |
|                                    | La Baroudeuse Road RACE / TransAlpes (cycling)                 |
|                                    | Bordeaux-Paris Ultra Cycling Challenge (cycling)               |
|                                    | Asics Sainté-Lyon (ultramarathon)                              |
|                                    | TransContinental Race (cycling)                                |
|                                    | L'Ultra Marin (ultramarathon)                                  |
|                                    | Gravel Tro Breizh (cycling)                                    |
|                                    | IronMan France (triathlon)                                     |
|                                    | EmbrunMan Triathlon (triathlon)                                |
|                                    | La Diagonale des Fous (mountain ultramarathon)                 |
|                                    | BayMan Triathlon (triathlon)                                   |
|                                    | Normandicat (cycling)                                          |
|                                    | AlpsMan Triathlon (triathlon)                                  |
|                                    | VercorsMan Triathlon (triathlon)                               |
|                                    | L'Endu'Rance Trail des Corsaires (ultramarathon)               |
|                                    | L'Ultratour des 4 massifs (Ut4M) (mountain ultramarathon)      |
| <b>Social networks groups</b>      | La Clinique du Coureur (running)                               |
|                                    | Ride Across France (cycling)                                   |
|                                    | Trail je suis addict (mountain ultramarathon)                  |
|                                    | Bref, je fais du triathlon (triathlon)                         |
|                                    | Ultracycling Aventure (cycling)                                |
|                                    | Baroudeur Team groupe privé (cycling)                          |
